# Supplementary material for: Assessing the In Vitro Activity of Selected Porphyrins in Human Colorectal Cancer Cells
Source: MDPI journal article supplement (doi:10.3390/molecules27062006), 2022-03-21

## Supplementary materials

Emission spectrum of visible fluorescent lamps (OSRAM L 15W/840, LUMILUX Cool White) used in the experiments.

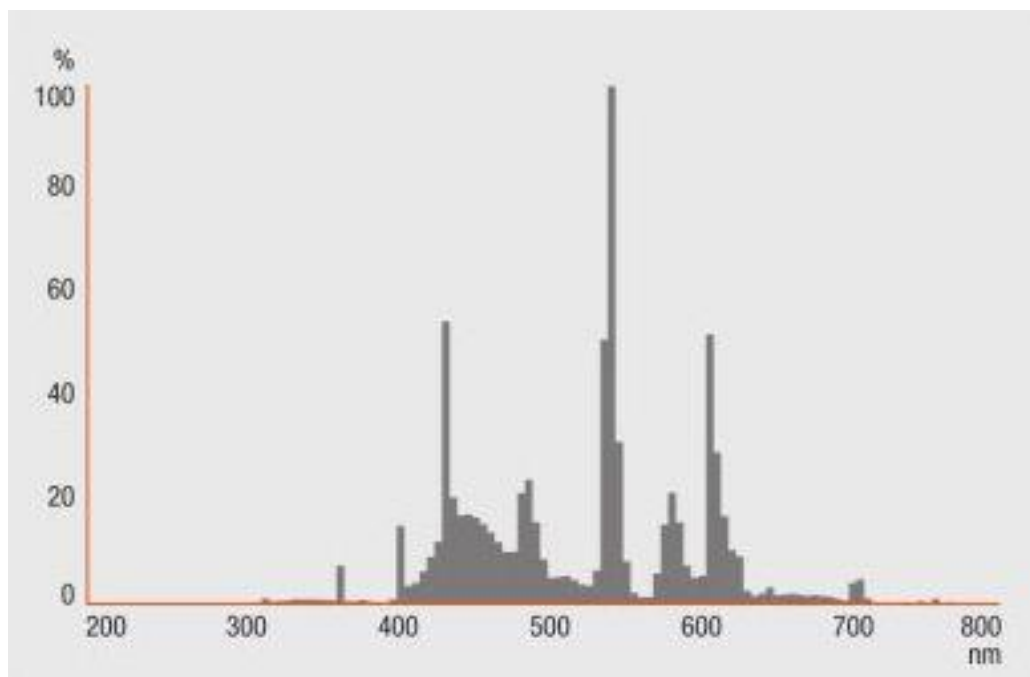

Supplement: s1 [file s1]
